# Supplementary material for: Phosphoinositide lipid phosphatase SHIP1 and PTEN coordinate to regulate cell migration and adhesion
Source: PubMed Central journal article supplement — Mol Biol Cell. 2012 Apr 1;23(7):1219–30. doi: 10.1091/mbc.E11-10-0889 (PMC3315799; doi:10.1091/mbc.e11-10-0889), 2012-04-01
Supplement: supp_E11-10-0889_CombinedSupMats.pdf [file supp_E11-10-0889_CombinedSupMats.pdf]

## **Supplemental information**

### **Legends for Videos**

**Video 1.** Attachment of wild type neutrophil on fibronectin coated surface. Wild type neutrophils were allowed to adhere on a fibronectin coated surface. Images capturing was initiated when the cell was still in suspension to visualize the process of cell adhesion.

**Video 2.** Attachment of SHIP1<sup>-/-</sup> neutrophil on a fibronectin coated surface. SHIP1<sup>-/-</sup> neutrophils were allowed to adhere on a fibronectin coated surface. Images capturing was initiated when the cell was still in suspension to visualize the process of cell adhesion.

**Video 3.** Chemotaxis of wild type neutrophils towards fMLP in a buffer containing 2% BSA. Chemotaxis of wild type neutrophils towards fMLP on a glass plate and buffer containing 2% BSA to reduce cell attachment using EZTaxiScan.

**Video 4.** Chemotaxis of SHIP1<sup>-/-</sup> neutrophils towards fMLP in a buffer containing 2% BSA. Chemotaxis of SHIP1<sup>-/-</sup> neutrophils towards fMLP on a glass plate and buffer containing 2% BSA to reduce cell attachment using EZTaxiScan.

**Video 5.** Chemotaxis of wild type neutrophils towards fMLP in a buffer containing 0.1% BSA. Chemotaxis of wild type neutrophils towards fMLP on a glass plate and buffer containing 0.1% BSA to reduce cell attachment using EZTaxiScan.

**Video 6.** Chemotaxis of SHIP1<sup>-/-</sup> neutrophils towards fMLP in a buffer containing 0.1% BSA. Chemotaxis of SHIP1<sup>-/-</sup> neutrophils towards fMLP on a glass plate and buffer containing 0.1% BSA to reduce cell attachment using EZTaxiScan.

**Video 7.** Chemotaxis of wild type neutrophils towards fMLP on a surface coated with fibronectin and containing RGD peptide in the buffer. Chemotaxis of wild type neutrophils towards fMLP on a glass plate coated with fibronectin and buffer containing RGD peptide to reduce cell attachment using EZTaxiScan.

**Video 8.** Chemotaxis of wild type neutrophils towards fMLP on a surface coated with fibronectin and containing RGD peptide in the buffer. Chemotaxis of SHIP1<sup>-/-</sup> neutrophils towards fMLP on a glass plate coated with fibronectin and buffer containing RGD peptide to reduce cell attachment using EZTaxiScan.

**Video 9.** Chemotaxis of wild type neutrophils towards fMLP on a surface coated with fibronectin. Chemotaxis of wild type neutrophils towards fMLP on a glass plate coated with fibronectin using EZTaxiScan.

**Video 10.** Chemotaxis of SHIP1<sup>-/-</sup> neutrophils towards fMLP on a surface coated with fibronectin. Chemotaxis of SHIP1<sup>-/-</sup> neutrophils towards fMLP on a glass plate coated with fibronectin using EZTaxiScan.
